# Supplementary figures and images for: Autophagy induction by thiostrepton improves the efficacy of immunogenic chemotherapy
Source: PubMed Central journal article supplement — J Immunother Cancer. 2020 Mar 26;8(1):e000462. doi: 10.1136/jitc-2019-000462 (PMC7206967; doi:10.1136/jitc-2019-000462), 2020-03-26

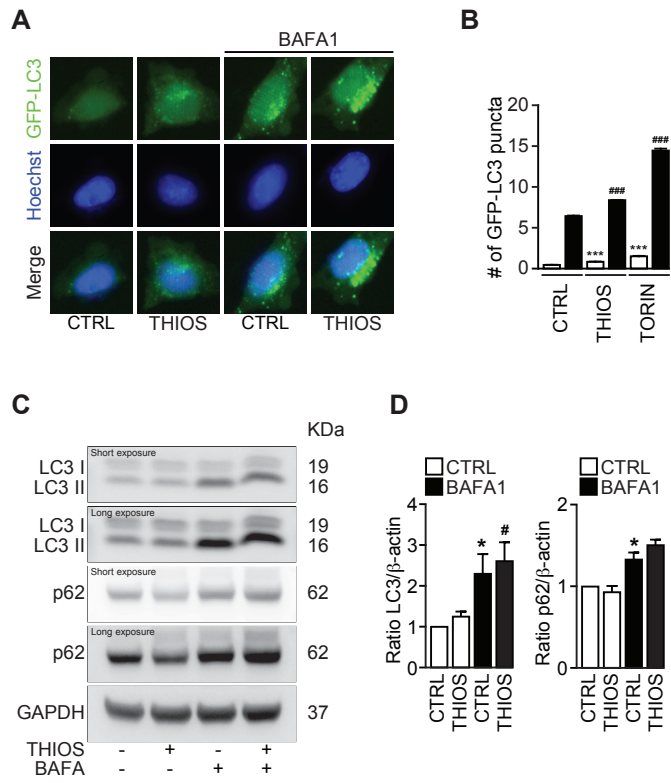

Figure S1

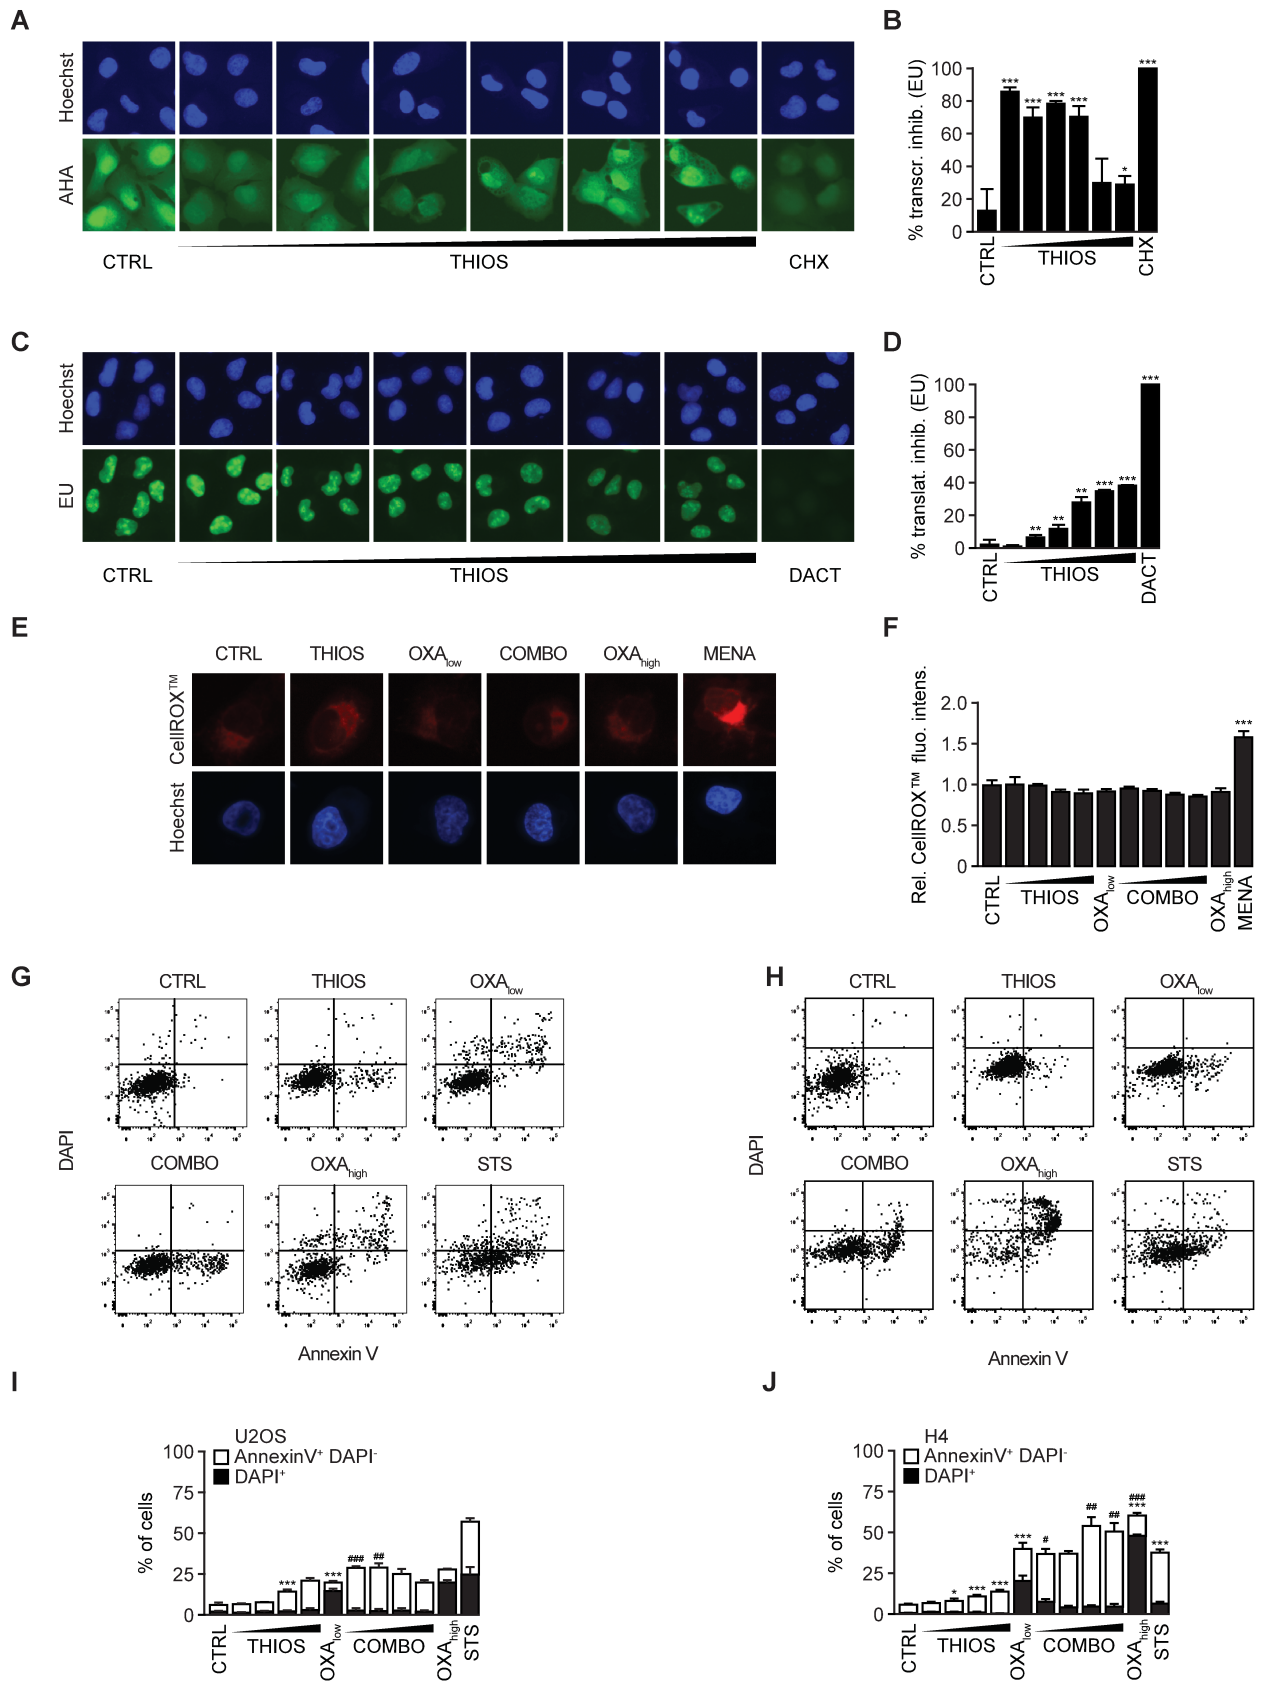

**Figure S2**

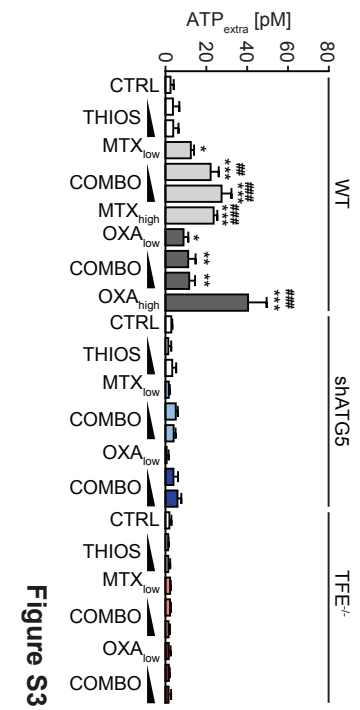

Figure S3

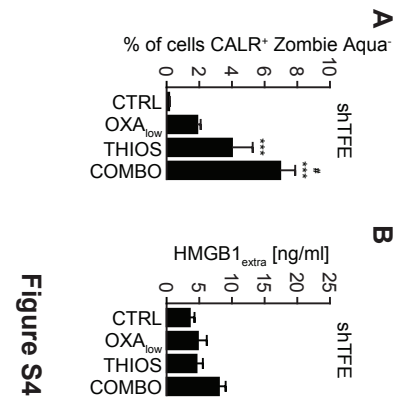

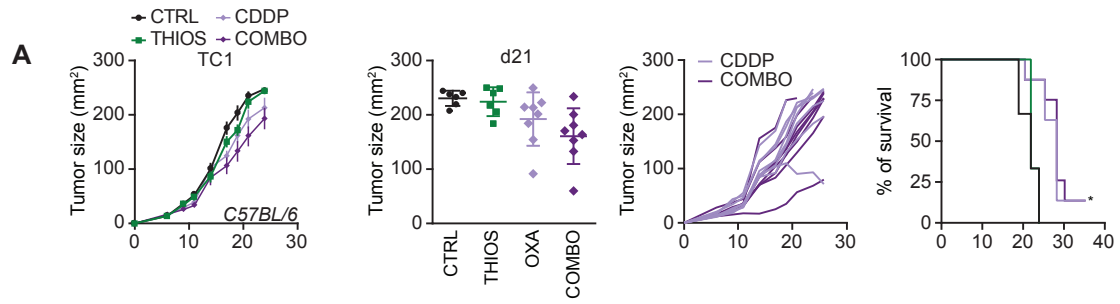

Figure S5

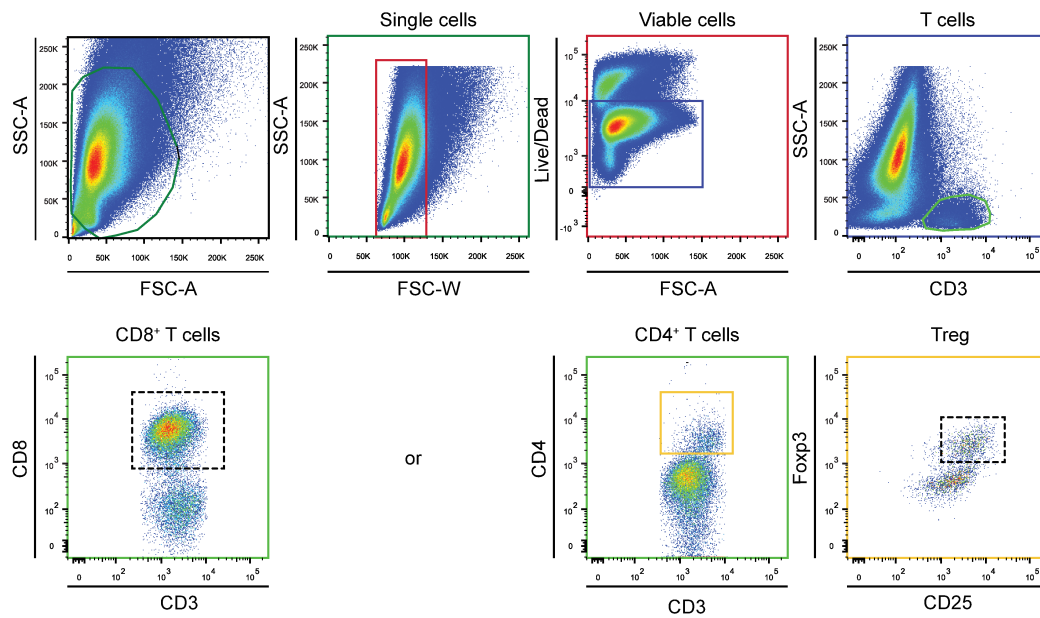

Figure S6

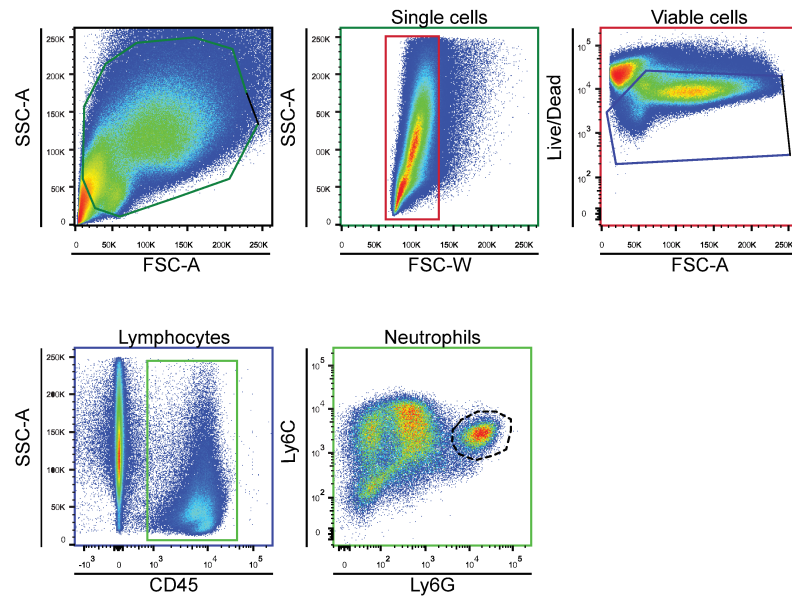

Figure S7

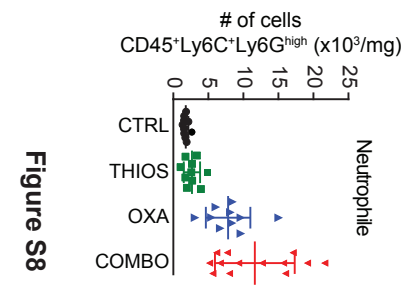

Supplement: jitc-2019-000462supp001.pdf [file jitc-2019-000462supp001.pdf]
